# Supplementary material for: A systematic review on nomophobia prevalence: Surfacing results and standard guidelines for future research
Source: PubMed Central journal article supplement (PMC8130950; doi:10.1371/journal.pone.0250509), 2021-05-18
Supplement: pone.0250509.s001.pdf [file pone.0250509.s001.pdf]

# A systematic review on nomophobia prevalence: Surfacing results and standard guidelines for future research

Ana C. León-Mejía<sup>1</sup><sup>\*</sup>, Mónica Gutiérrez-Ortega<sup>1</sup>, Isabel  
Serrano-Pintado<sup>2</sup>, Joaquín González-Cabrera<sup>1</sup>

**1** Department of Psychology, Faculty of Education, Universidad  
Internacional de La Rioja (UNIR), Spain

**2** Department of Psychology, Faculty of Psychology, Universidad de  
Salamanca, Spain

 These authors contributed equally to this work.

\* Corresponding author:

: aleon@unir.net

## S1. Appendix A: Studies included in the qualitative synthesis

| Authorship                      | Year | Journal of publication                                                         | Country      |
|---------------------------------|------|--------------------------------------------------------------------------------|--------------|
| 1. Abdulmohsin Suli Man [1]     | 2019 | <a href="#">International Journal of Computer Science and Network Security</a> | Saudi Arabia |
| 2. Adawi et al. [2]             | 2018 | <a href="#">JMIR mHealth and uHealth</a>                                       | Italy        |
| 3. Adawi et al. [3]             | 2019 | <a href="#">Psychology Research and Behavior Management</a>                    | Italy        |
| 4. Adnan and Gezgin [4]         | 2016 | <a href="#">Journal of Faculty of Educational Sciences</a>                     | Turkey       |
| 5. Aguilera-Manrique et al. [5] | 2018 | <a href="#">PLOS ONE</a>                                                       | Spain        |
| 6. Ahmed et al. (2019a) [6]     | 2019 | <a href="#">Journal of Public Health</a>                                       | India        |
| 7. Ahmed et al. (2019b) [7]     | 2019 | <a href="#">Indian Journal of Psychiatry</a>                                   | India        |
| 8. Aini et al. [8]              | 2018 | <a href="#">Jurnal Ners Widya Husada Semarang</a>                              | Indonesia    |
| 9. Aktay and Hanife [9]         | 2019 | <a href="#">International Technology and Education Journal</a>                 | Turkey       |
| 10. Al-Balhan et al. [10]       | 2018 | <a href="#">Psychology Research and Behavior Management</a>                    | Kuwait       |
| 11. Ali et al. [11]             | 2017 | <a href="#">Advanced Science Letters</a>                                       | Malaysia     |
| 12. Anushri et al. [12]         | 2018 | <a href="#">Journal of Nursing Research</a>                                    | India        |
| 13. Apak and Yaman [13]         | 2019 | <a href="#">Addicta: The Turkish Journal in Addictions</a>                     | Turkey       |
| 14. Arpaci et al. [14]          | 2017 | <a href="#">Information Development</a>                                        | Turkey       |
| 15. Arpaci et al. [15]          | 2017 | <a href="#">Information Development</a>                                        | Turkey       |
| 16. Arpaci et al. [16]          | 2017 | <a href="#">Journal of Medical Internet Research</a>                           | Turkey       |
| 17. Asensio Chico et al. [17]   | 2018 | <a href="#">Medicina de Familia. SEMERGEN</a>                                  | Spain        |
| 18. Ayar et al. [18]            | 2018 | <a href="#">CIN: Computers, Informatics, Nursing</a>                           | Turkey       |
| 19. Bartwal and Nath [19]       | 2019 | <a href="#">Medical Journal Armed Forces</a>                                   | India        |
| 20. Batool and Ayesha [20]      | 2019 | <a href="#">Peshawar Journal of Psychology and Behavioral Sciences</a>         | Turkey       |
| 21. Bernardini [21]             | 2018 | <a href="#">Polygree</a>                                                       | Italy        |
| 22. Bivin et al. [22]           | 2013 | <a href="#">Reviews of Progress</a>                                            | India        |
| 23. Bragazzi et al. [23]        | 2019 | <a href="#">JMIR Mental Health</a>                                             | Italy        |

|     |                                |      |                                                                                      |                |
|-----|--------------------------------|------|--------------------------------------------------------------------------------------|----------------|
| 24. | Bülbüloğlu et al. [24]         | 2019 | <a href="#">Journal of Substance Use</a>                                             | Turkey         |
| 25. | Cain and Malcom [25]           | 2019 | <a href="#">American Journal of Pharmaceutical Education</a>                         | USA            |
| 26. | Chandak et al. [26]            | 2017 | <a href="#">International Journal of Indian Psychology</a>                           | India          |
| 27. | Chemara and Octaviani [27]     | 2017 | <a href="#">Journal of Innovative Research in Social Sciences &amp; Humanities</a>   | Indonesia      |
| 28. | Chukwuemeka et al. [28]        | 2017 | <a href="#">Practicum Psychologia</a>                                                | Nigeria        |
| 29. | Daei et al. [29]               | 2019 | <a href="#">International Journal of Preventive Medicine</a>                         | Iran           |
| 30. | Darvishi et al. [30]           | 2019 | <a href="#">Open Access Macedonian Journal of Medical Sciences</a>                   | Iran           |
| 31. | Dasgupta et al. [31]           | 2017 | <a href="#">Indian Journal of Public Health</a>                                      | India          |
| 32. | Datta et al. [32]              | 2016 | <a href="#">Journal of Evolution of Medical and Dental Sciences</a>                  | India          |
| 33. | Davie and Hilber [33]          | 2017 | <a href="#">International Association for Development of the Information Society</a> | Germany        |
| 34. | Deryakulu and Ursavaş [34]     | 2019 | <a href="#">Addicta: The Turkish Journal on Addictions</a>                           | Turkey         |
| 35. | Dixit et al. [35]              | 2010 | <a href="#">Indian Journal of Community Medicine</a>                                 | India          |
| 36. | Dongre et al. [36]             | 2017 | <a href="#">National Journal of Community Medicine</a>                               | India          |
| 37. | Elyasi et al. [37]             | 2018 | <a href="#">Addiction &amp; Health</a>                                               | Iran           |
| 38. | Farooqui et al. [38]           | 2016 | <a href="#">Journal of Mental Health</a>                                             | India          |
| 39. | Fitz et al. [39]               | 2019 | <a href="#">Computers in Human Behavior</a>                                          | USA            |
| 40. | Galhardo et al. [40]           | 2020 | <a href="#">Community Mental Health Journal</a>                                      | Portugal       |
| 41. | Gentina et al. [41]            | 2018 | <a href="#">Computers &amp; Education</a>                                            | USA            |
| 42. | Gezgin and Çakır [42]          | 2016 | <a href="#">Journal of Human Sciences</a>                                            | Turkey         |
| 43. | Gezgin et al. (2017a) [43]     | 2017 | <a href="#">Trakya University Journal of Education Faculty</a>                       | Turkey         |
| 44. | Gezgin (2017b) [44]            | 2017 | <a href="#">European Journal of Education Studies</a>                                | Turkey         |
| 45. | Gezgin et al. (2018a) [45]     | 2018 | <a href="#">International Journal of Research in Education and Science</a>           | Turkey         |
| 46. | Gezgin et al. (2018b) [46]     | 2018 | <a href="#">International Journal of Research in Education and Science</a>           | Turkey         |
| 47. | Gezgin et al.(2018c) [47]      | 2018 | <a href="#">Cypriot Journal of Educational Sciences</a>                              | Turkey         |
| 48. | González-Cabrera et al. [133]  | 2018 | <a href="#">Actas Españolas de Psiquiatría</a>                                       | Spain          |
| 49. | Gutiérrez-Puertas et al. [132] | 2019 | <a href="#">Nurse Education in Practice</a>                                          | Spain/Portugal |

|     |                                       |      |                                                               |           |
|-----|---------------------------------------|------|---------------------------------------------------------------|-----------|
| 50. | Gutiérrez-Puertas et al. [48]         | 2016 | CIN: Computers, Informatics, Nursing                          | Spain     |
| 51. | Han et al. [49]                       | 2017 | Cyberpsychology, Behavior, and Social Networking              | Turkey    |
| 52. | Harish and Bharath [50]               | 2018 | International Journal Of Community Medicine And Public Health | India     |
| 53. | Jianling and Chang [51]               | 2018 | Current Psychology                                            | China     |
| 54. | Jilisha et al. [52]                   | 2019 | Indian Journal of Psychological Medicine                      | India     |
| 55. | Jones et al. [53]                     | 2019 | Journal of Strength and Conditioning Research                 | Australia |
| 56. | Kanmani [54]                          | 2017 | The International Journal of Indian Psychology                | Turkey    |
| 57. | Kar [55]                              | 2017 | Journal of Bio Innovation                                     | India     |
| 58. | Kara et al. [56]                      | 2019 | Journal Behaviour & Information Technology                    | Turkey    |
| 59. | Kaur et al. [57]                      | 2015 | International Journal of Psychiatric Nursing                  | India     |
| 60. | King et al. [?]                       | 2014 | Clinical Practice and Epidemiology in Mental Health           | Brasil    |
| 61. | King et al. [58]                      | 2017 | Journal of Addiction Research & Therapy                       | Brasil    |
| 62. | Koay et al. [59]                      | 2019 | Southeast Asia Psychology Journal                             | Malasya   |
| 63. | Lee et al. [60]                       | 2012 | Journal of Physical Therapy Science                           | Korea     |
| 64. | Lee et al. [61]                       | 2017 | Applied Cognitive Psychology                                  | USA       |
| 65. | Lee et al. [62]                       | 2018 | Heliyon                                                       | USA       |
| 66. | Lin et al. [63]                       | 2018 | Journal of Behavioral Addiction                               | Iran      |
| 67. | Louragli et al. [64]                  | 2018 | Problems of Psychology in the 21st Century                    | Morocco   |
| 68. | Mallya et al. [65]                    | 2018 | National Journal of Physiology, Pharmacy and Pharmacology     | India     |
| 69. | Mane [66]                             | 2017 | Imperial Journal of Interdisciplinary Research                | India     |
| 70. | Matoza-Báez and Carballo-Ramírez [67] | 2016 | Ciencia e Investigación Médica Estudiantil Latinoamericana    | Paraguay  |
| 71. | Mendoza et al. [68]                   | 2018 | Computers in Human Behavior                                   | USA       |
| 72. | Menezes and Pangam [69]               | 2017 | International Journal of Psychiatric Nursing                  | India     |
| 73. | Peris et al. [70]                     | 2018 | Revista de Psicología Clínica con Niños y Adolescentes        | Spain     |
| 74. | Muralidhar et al. [71]                | 2017 | International Journal of Medical Science and Public Health    | India     |
| 75. | Musa et al. [72]                      | 2017 | Advanced Science Letters                                      | Malasya   |

|      |                               |      |                                                                          |                 |
|------|-------------------------------|------|--------------------------------------------------------------------------|-----------------|
| 76.  | Nagpal and Ramanpreet [73]    | 2016 | Indian Journal of Health & Wellbeing                                     | India           |
| 77.  | Nawaz et al. [74]             | 2017 | Journal of Technology in Behavioral Sciences                             | Pakistan        |
| 78.  | Nezih [75]                    | 2018 | International Journal of Research in Education and Science               | Turkey          |
| 79.  | Nidhin et al. [76]            | 2014 | Asian Journal of Nursing Education and Research                          | India           |
| 80.  | Nisreen et al. [77]           | 2018 | The Medical Journal of Tikrit University                                 | Irak            |
| 81.  | Olivencia-Carrión et al. [78] | 2018 | Psychiatry Research                                                      | Spain           |
| 82.  | Ozdemir et al. [79]           | 2018 | Eurasia Journal of Mathematics, Science and Technology Education         | Pakistan/Turkey |
| 83.  | Pavithra et al. [80]          | 2015 | National Journal of Community Medicine                                   | India           |
| 84.  | Prasad et al. [81]            | 2017 | Journal of Clinical and Diagnostic Research                              | India           |
| 85.  | Priyanka and Kishanth [82]    | 2016 | International Journal of Nursing Education                               | India           |
| 86.  | Ramos-Soler et al. [130]      | 2017 | Salud y Drogas                                                           | Spain           |
| 87.  | Rangka et al. [83]            | 2018 | Journal of Physics: Conference Series                                    | Indonesia       |
| 88.  | Rosales-Huamani et al. [84]   | 2019 | Applied Sciences                                                         | Peru            |
| 89.  | Sakiroglu et al. [85]         | 2017 | International Journal of Psycho-Educational Sciences                     | Turkey          |
| 90.  | Salwa [86]                    | 2017 | Journal of Research in Curriculum Instruction and Educational Technology | Saudi Arabia    |
| 91.  | Sebin and Jinesh [87]         | 2018 | International Journal of Engineering Technology Science and Research     | India           |
| 92.  | Semerci [88]                  | 2019 | Bartın University Journal of Faculty of Education                        | Turkey          |
| 93.  | Sethia et al. [89]            | 2018 | International Journal of Community Medicine and Public Health            | India           |
| 94.  | Sharma et al. [90]            | 2015 | International Journal of Research in Medical Sciences                    | India           |
| 95.  | Silva Giraldo et al. [91]     | 2018 | Boletín Redipe                                                           | Colombia        |
| 96.  | Tams et al. [92]              | 2018 | Computers in Human Behavior                                              | Canada          |
| 97.  | Tavolacci et al. [93]         | 2015 | European Journal of Public Health                                        | France          |
| 98.  | Torres-Salazar et al. [94]    | 2018 | Revista Internacional de Investigación en Adicciones                     | Mexico          |
| 99.  | Uysal et al. [95]             | 2016 | The Global eLearning Journal                                             | India           |
| 100. | Veerapu et al. [96]           | 2019 | International Journal of Community Medicine And Public Health            | India           |
| 101. | Yasan Ak and Yildirim [97]    | 2018 | International Journal on New Trends in Education and their Implications  | Turkey          |

|                                         |      |                                                            |        |
|-----------------------------------------|------|------------------------------------------------------------|--------|
| 102. Yavuz et al. [98]                  | 2014 | <a href="#">The Turkish Journal of Pediatrics</a>          | Turkey |
| 103. Yildirim [126]                     | 2014 | <a href="#">Iowa State University</a>                      | USA    |
| 104. Yildirim and Correia (2015a) [127] | 2015 | <a href="#">Computers in Human Behavior</a>                | Turkey |
| 105. Yildirim and Correia (2015b) [128] | 2015 | <a href="#">Learning and Collaboration Technologies</a>    | USA    |
| 106. Yildirim et al. (2015) [129]       | 2015 | <a href="#">Information Development</a>                    | USA    |
| 107. Yildiz-Durak [99]                  | 2018 | <a href="#">Addicta: The Turkish Journal on Addictions</a> | Turkey |
| 108. Yildiz-Durak [100]                 | 2019 | <a href="#">The Social Science Journal</a>                 | Turkey |

## S1. Appendix B: A selection of studies not included in the qualitative synthesis

The literature on NMP is huge and there is a very large number of studies worth reading that we did not include in the qualitative synthesis due to our research questions and inclusion criteria. In the following list there is a selection of some of them that we find particularly interesting because of the perspective followed: focus on qualitative research, clinical view and therapeutical approach, and theoretical discussion of nomophobia from a novel point of view.

| Reference of the study        | Year | Journal of publication                                                            | Country      |
|-------------------------------|------|-----------------------------------------------------------------------------------|--------------|
| King et al. [125]             | 2010 | <a href="#">Cognitive and Behavioral Neurology</a>                                | Brasil       |
| King et al. [101]             | 2013 | <a href="#">Computers in Human Behavior</a>                                       | Brasil       |
| Bragazzi and Del Puente [102] | 2014 | <a href="#">Psychology Research and Behavior Management</a>                       | Italy        |
| Cheever et al. [103]          | 2014 | <a href="#">Computers in Human Behavior</a>                                       | US           |
| Tran [104]                    | 2016 | <a href="#">UC Merced Undergraduate Research Journal</a>                          | US           |
| Rosen et al. [105]            | 2016 | <a href="#">Sleep Health in Early Care and Education</a>                          | US           |
| Pistilli and Cain [106]       | 2016 | <a href="#">Currents in Pharmacy Teaching and Learning</a>                        | US           |
| Pathak [107]                  | 2016 | <a href="#">Journal of Research in Humanities &amp; Soc. Sciences</a>             | India        |
| Belk [108]                    | 2016 | <a href="#">Current Opinion in Psychology</a>                                     | Canada       |
| Aagaard [109]                 | 2016 | <a href="#">AI &amp; Society</a>                                                  | Denmark      |
| Kuss and Griffiths [110]      | 2017 | <a href="#">International Journal of Environmental Research and Public Health</a> | UK           |
| García-Umaña [111]            | 2017 | <a href="#">Dilemas Contemporáneos</a>                                            | Ecuador      |
| Prasyatiani et al. [112]      | 2017 | <a href="#">4th International Conference on Education and Social Sciences</a>     | Indonesia    |
| Papaconstantinou et al. [113] | 2017 | <a href="#">Sleep Medicine</a>                                                    | US           |
| Akun and Andreani [114]       | 2017 | <a href="#">International Conference on Human System Interactions</a>             | Indonesia    |
| van Velthoven et al. [115]    | 2018 | <a href="#">Digital Health</a>                                                    | UK           |
| Güzel [116]                   | 2018 | <a href="#">Journal of Academic Perspective on Social Studies</a>                 | Saudi Arabia |
| Wang and Suh [117]            | 2018 | <a href="#">The 2018 CHI Conference</a>                                           | Hong Kong    |
| Bychkov and Young [118]       | 2018 | <a href="#">Big Data in Engineering Applications</a>                              | US           |

|                            |      |                                                                                   |                      |
|----------------------------|------|-----------------------------------------------------------------------------------|----------------------|
| Bhattacharya et al. [119]  | 2018 | <a href="#">Journal of Family Medicine and Primary Care</a>                       | India                |
| Liu et al. [120]           | 2019 | <a href="#">International Journal of Environmental Research and Public Health</a> | China, Canada and US |
| Gezgin et al. [121]        | 2019 | <a href="#">Bartın University Journal of Faculty of Education</a>                 | Turkey               |
| Anshari et al. [122]       | 2019 | <a href="#">Vulnerable Children and Youth Studies</a>                             | Brunei               |
| Betoncu and Ozdamli [123]  | 2019 | <a href="#">TEM Journal</a>                                                       | Turkey               |
| Park and Kaye [124]        | 2019 | <a href="#">Mobile Media &amp; Communication</a>                                  | US                   |
| Wahyuningtyas et al. [131] | 2020 | <a href="#">Jurnal Bimbingan Konseling</a>                                        | Indonesia            |
| León-Mejía et al [134]     | 2020 | <a href="#">Adicciones</a>                                                        | Spain                |



## References

1. Abdulmohsin Suli Man A. An Empirical Study of Nomophobia Behavior of Saudi Learners. *International Journal of Computer Science and Network Security*. 2019;19(10):20–25.
2. Adawi M, Bragazzi NL, Argumosa-Villar L, Boada-Grau J, Vigil-Colet A, Yildirim C, et al. Translation and Validation of the Nomophobia Questionnaire (NMP-Q) in the Italian Language: Insights From Factor Analysis. *JMIR mHealth and uHealth*. 2018;6. doi:10.2196/mhealth.9186.
3. Adawi M, Zerbetto R, Simona Re T, Bisharat B, Mahamid M, Amital H, et al. Psychometric Properties of the Brief Symptom Inventory in Nomophobic Subjects: Insights from Preliminary Confirmatory Factor, Exploratory Factor, and Clustering Analyses in a Sample of Healthy Italian Volunteers. *Psychology Research and Behavior Management*. 2019;12:145–154. doi:10.2147/PRBM.S173282.
4. Adnan M, Gezgin D. A Modern Phobia: Prevalence of Nomophobia Among College Students. *Journal of Faculty of Educational Sciences*. 2016;49:2016–2141. doi:10.1501/Egifak.0000001378.
5. Aguilera-Manrique G, Márquez-Hernández VV, Alcaraz-Córdoba T, Granados-Gámez G, Gutiérrez-Puertas V, Gutiérrez-Puertas L. The Relationship Between Nomophobia and the Distraction Associated with Smartphone Use Among Nursing Students in their Clinical Practicum. *PLOS ONE*. 2018;13(8):e0202953.
6. Ahmed S, Pokhrel N, Roy S, Samuel A. Impact of Nomophobia: A Nondrug Addiction Among Students of Physiotherapy Course Using an Online Cross-Sectional Survey. *Indian Journal of Psychiatry*. 2019;61:77–80. doi:10.4103/psychiatry.IndianJPsychiatry.361.18.
7. Ahmed S, Akter R, Pokhrel N, Samuel A. Prevalence of Text Neck Syndrome and SMS Thumb Among Smartphone Users in College-Going Students: A Cross-Sectional Survey Study. *Journal of Public Health*. 2019; p. 1–6. doi:10.1007/s10389-019-01139-4.
8. Aini K, Retnaningsih D, ATrisnaja PA. The Influence of Thought Stopping Therapy to Nomophobia on Nursing College Students of Widya Husada Semarang. *Jurnal Ners Widya Husada Semarang*. 2018;3(3).
9. Aktay EG, Hanife PK. Primary School Teacher Candidates and Nomophobia. *International Technology and Education Journal*. 2019;3(1):16–24.
10. Al-Balhan E, KHabbache H, Watfa A, Simona Re T, Zerbetto R, Bragazzi NL. Psychometric Evaluation of the Arabic Version of the Nomophobia Questionnaire: Confirmatory and Exploratory Factor Analysis. Implications From a Pilot Study in Kuwait Among University Students. *Psychology Research and Behavior Management*. 2018;11. doi:10.2147/PRBM.S169918.

11. Ali A, Muda M, Ridzuan AR, Nuji MNN, Izzamuddin M, Imma D. The Relationship Between Phone Usage Factors and Nomophobia. *Advanced Science Letters*. 2017;23:7610–7613. doi:10.1166/asl.2017.9534.
12. Anushri C, Darshana T, B M, Pranali W, Sneha Y, Lakshmanan M. A Study to Assess Nomophobia among Higher Secondary Students in Order to Develop a Pamphlet Regarding Prevention of Nomophobia in Nagpur City. *Journal of Nursing Research*. 2018;3(1):53–57.
13. Apak E, Yaman OM. The Prevalence of Nomophobia among University Students and Nomophobia's Relationship with Social Phobia: The Case of Bingöl University. *Addicta: The Turkish Journal on Addictions*. 2019;6(3):611–629. doi:10.15805/addicta.2019.6.3.0078.
14. Arpacı I, Baloğlu M, Kesici S. A Multi-Group Analysis of the Effects of Individual Differences in Mindfulness on Nomophobia. *Information Development*. 2017;35. doi:10.1177/0266666917745350.
15. Arpacı I. Culture and Nomophobia: The Role of Vertical Versus Horizontal Collectivism in Predicting Nomophobia. *Information Development*. 2017;35:026666691773011. doi:10.1177/0266666917730119.
16. Arpacı I, Baloğlu M, Özteke Kozan H, Ş K. Individual Differences in the Relationship Between Attachment and Nomophobia Among College Students: The Mediating Role of Mindfulness. *Journal of Medical Internet Research*. 2017;19(2):e404. doi:10.2196/jmir.8847.
17. Asensio Chico I, Díaz Maldonado L, Garrote Moreno L. Nomophobia: Enfermedades del Siglo Veintiuno. *Medicina de Familia*. 2018;44(7):e117–e118. doi:10.1016/j.semerg.2018.05.002.
18. Ayar D, Özalp Gerçeker G, Özdemir EZ, Bektas M. The Effect of Problematic Internet Use, Social Appearance Anxiety, and Social Media Use on Nursing Students' Nomophobia Levels. *CIN: Computers, Informatics, Nursing*. 2018;36(12).
19. Bartwal J, Nath B. Evaluation of Nomophobia Among Medical Students Using Smartphone in North India. *Medical Journal Armed Forces India*. 2019;doi:10.1016/j.mjafi.2019.03.001.
20. Batool I, Ayesha Z. Nomophobia an Emerging Fear: An Experimental Exploration among University Students. *Peshawar Journal of Psychology and Behavioral Sciences*. 2019;5(1).
21. Bernardini J. Nomophobia and Digital Natives. An Empirical Research Study Among Young Italians. *Polygree*. 2018;15.
22. Bivin JB, Preeti M, Praveen C, Jinto P. Nomophobia - Do We Really Need to Worry About? A Cross Sectional Study on Nomophobia Severity Among Male Under Graduate Students of Health Sciences. *Reviews of Progress*. 2013;1(1):1–5.
23. Bragazzi NL, Simona Re T, Zerbetto R. The Relationship Between Nomophobia and Maladaptive Coping Styles in a Sample

of Italian Young Adults: Insights and Implications From a Cross-Sectional Study. *JMIR Mental Health*. 2019;6(4):e13154–e13154. doi:10.2196/13154.

24. Bülbüloğlu S, Özdemir A, Kapıkıran G, Sarıtaş S. The Effect of Nomophobic Behavior of Nurses Working at Surgical Clinics on Time Management and Psychological Well-Being. *Journal of Substance Use*. 2019; p. 1–6. doi:10.1080/14659891.2019.1692926.
25. Cain J, Malcom D. An Assessment of Pharmacy Students' Psychological Attachment to Smartphones at Two Colleges of Pharmacy. *American Journal of Pharmaceutical Education*. 2019;83:7136. doi:10.5688/ajpe7136.
26. Chandak P, Singh D, Faye A, Gawande S, Tadke R, Kirpekar V, et al. An Exploratory Study of Nomophobia in Post Graduate Residents of a Teaching Hospital in Central India. *International Journal of Indian Psychology*. 2017;4(3). doi:10.25215/0403.147.
27. Chemara Z, Octaviani UF. Nomophobia Around Us! *Journal of Innovative Research in Social Sciences & Humanities*. 2017;1(1):1–35.
28. Chukwuemeka FO, Obi-Nwosu H, Obikwelu VC. Nomophobia Among Undergraduate: Predictive Influence of Personality Traits. *Practicum Psychologia*. 2017;7(2):64–74.
29. Daei A, Ashrafi-rizi H, Soleymani MR. Nomophobia and Health Hazards: Smartphone Use and Addiction Among University Students. *International Journal of Preventive Medicine*. 2019;10:202. doi:10.4103/ijpvm.IJPVM\_184\_19.
30. Darvishi M, Noori M, Nazer MR, Sheikholeslami S, Karimi E. Investigating Different Dimensions of Nomophobia among Medical Students: A Cross-Sectional Study. *Open Access Macedonian Journal of Medical Sciences*. 2019;7(4):573–578. doi:10.3889/oamjms.2019.138.
31. Dasgupta P, Bhattacharjee S, Dasgupta S, Roy J, Mukherjee A, Biswas R. Nomophobic Behaviors Among Smartphone Using Medical and Engineering students in Two Colleges of West Bengal. *Indian Journal of Public Health*. 2017;61:199–204. doi:10.4103/ijph.IJPH\_81\_16.
32. Datta S, Nelson V, Simon S. Mobile Phone Use Pattern and Self Reported Health Problems Among Medical Students. *Journal of Evolution of Medical and Dental Sciences*. 2016;5. doi:10.14260/jemds/2016/259.
33. Davie N, Hilber T. Nomophobia: Is Smartphone Addiction a Genuine Risk for Mobile Learning? *International Association for Development of the Information Society*. 2017;.
34. Deryakulu D, Ursavaş Ö. Genetic and Environmental Sources of Nomophobia: A Small-Scale Turkish Twin Study. *Addicta: The Turkish Journal on Addictions*. 2019;6. doi:10.15805/addicta.2019.6.1.0028.

35. Dixit S, Shukla H, Bhagwat A, Bindal A, Goyal A, Zaidi A, et al. A Study to Evaluate Mobile Phone Dependence Among Students of a Medical College and Associated Hospital of Central India. *Indian Journal of Community Medicine*. 2010;35(2):339–341.
36. Dongre AS, Inamdar IF, Gattani PL. Nomophobia: A Study to Evaluate Mobile Phone Dependence and Impact of Cell Phone on Health. *National Journal of Community Medicine*. 2017;8(11):688–693.
37. Elyasi F, Hakimi B, Islami-Parkoochi P. The Validity and Reliability of the Persian Version of Nomophobia Questionnaire. *Addiction & Health*. 2018;10:231–241. doi:10.22122/ahj.v10i4.647.
38. Farooqui IA, Pore P, Gothankar J. Nomophobia: An Emerging Issue in Medical Institutions? *Journal of Mental Health*. 2016;27(5):438–41. doi:10.13140/RG.2.2.34355.12328.
39. Fitz N, Kushlev K, Jagannathan R, Lewis T, Paliwal D, Ariely D. Batching Smartphone Notifications Can Improve Well-Being. *Computers in Human Behavior*. 2019;101:84–94. doi:10.1016/j.chb.2019.07.016.
40. Galhardo A, Loureiro D, Raimundo E, Massano-Cardoso I, Cunha M. Assessing Nomophobia: Validation Study of the European Portuguese Version of the Nomophobia Questionnaire. *Community Mental Health Journal*. 2020;doi:10.1007/s10597-020-00600-z.
41. Gentina E, Tang TLP, Dancoine PF. Does Gen Z's Emotional Intelligence Promote iCheating (Cheating with iPhone) Yet Curb iCheating Through Reduced Nomophobia? *Computers & Education*. 2018;126:231–247. doi:10.1016/j.compedu.2018.07.011.
42. Gezgin DM, Çakır Ö. Analysis of Nomophobic Behaviors of Adolescents Regarding Various Factors. *Journal of Human Sciences*. 2016;13(2 SE):2504–2519.
43. Gezgin D, Sumuer E, Arslan O, Yildirim S. Nomophobia Prevalence Among Pre-service Teachers: A case of Trakya University. *Trakya University Journal of Education Faculty*. 2017;7.
44. Gezgin D. Exploring The Influence of The Patterns of Mobile Internet Use on University Students' Nomophobia Levels. *European Journal of Education Studies*. 2017;3(6):29–53. doi:10.5281/zenodo.572344.
45. Gezgin D, Çakır Ö, Yildirim S. The Relationship between Levels of Nomophobia Prevalence and Internet Addiction among High School Students: the factors influencing Nomophobia. *International Journal of Research in Education and Science*. 2018;4(1):215–225. doi:10.21890/ijres.383153.
46. Gezgin D, Hamutoglu N, Sezen-Gultekin G, Ayas T. The Relationship Between Nomophobia and Loneliness Among Turkish Adolescents. *International Journal of Research in Education and Science*. 2018;4(2):358–374.

47. Gezgin D, Hamutoglu N, Sezen-Gultekin G, Gemikonakli O. Relationship Between Nomophobia and Fear of Missing Out Among Turkish University Students. *Cypriot Journal of Educational Sciences*. 2018;13(4):549–561. doi:10.18844/cjes.v13i4.3464.
48. Gutiérrez-Puertas L, Hernández VV, Aguilera-Manrique G. Adaptation and Validation of the Spanish Version of the Nomophobia Questionnaire in Nursing Studies. *CIN: Computers, Informatics, Nursing*. 2016;34(10):470–475. doi:10.1097/CIN.000000000000268.
49. Han S, Kim KJ, Kim JH. Understanding Nomophobia: Structural Equation Modeling and Semantic Network Analysis of Smartphone Separation Anxiety. *Cyberpsychology, Behavior, and Social Networking*. 2017;20(7):419–427. doi:10.1089/cyber.2017.0113.
50. Harish BR, Bharath J. Prevalence of Nomophobia Among the Undergraduate Medical Students of Mandya Institute of Medical Sciences, Mandya. *International Journal Of Community Medicine And Public Health*. 2018;5(12). doi:10.18203/2394-6040.ijcmph20184833.
51. Jianling M, Chang L. Evaluation of the Factor Structure of the Chinese Version of the Nomophobia Questionnaire. *Current Psychology*. 2018; p. 1–7. doi:10.1007/s12144-018-0071-9.
52. Jilisha G, J V, Menon V, Olickal J. Nomophobia: A Mixed-Methods Study on Prevalence, Associated Factors, and Perception Among College Students in Puducherry, India. *Indian Journal of Psychological Medicine*. 2019;41(6):541–548. doi:10.4103/IJPSYM.IJPSYM-130.19.
53. Jones M, Dawson B, Eastwood P, Halson S, Miller J, Murray K, et al. Influence of Electronic Devices on Sleep and Cognitive Performance During Athlete Training Camps. *Journal of Strength and Conditioning Research*. 2019;6. doi:10.1519/JSC.0000000000002991.
54. Kanmani A. Nomophobia-An Insight into Its Psychological Aspects in India. *The International Journal of Indian Psychology*. 2017;4(2):6–15.
55. Kar S. Prevalence of Nomophobia Among Medical Students in a Private College of Bhubaneswar, Odisha. *Journal of Bio Innovation*. 2017;6:914–920.
56. Kara M, Baytemir K, İnceman-Kara F. Duration of Daily Smartphone Usage as an Antecedent of Nomophobia: Exploring Multiple Mediation of Loneliness and Anxiety. *Journal Behaviour & Information Technology*. 2019;1(4).
57. Kaur A, Sharma P, Manu. A Descriptive Study to Assess the Risk of Developing Nomophobia among Students of Selected Nursing Colleges Ludhiana, Punjab. *International Journal of Psychiatric Nursing*. 2015;1:1. doi:10.5958/2395-180X.2015.00051.1.

58. King ALS, Guedes E, Simões Neto JP, Leite F, Nardi A. Nomophobia: Clinical and Demographic Profile of Social Network Excessive Users. *Journal of Addiction Research & Therapy*. 2017;08(4):1. doi:10.4172/2155-6105.1000339.
59. Koay, Yin K, Yahaya A, Sangryeol C, Maakip I, Voo P, et al. Smartphone Usage, Smartphone Addiction, Internet Addiction and Nomophobia University Malasya Sabah (UMS). *Southeast Asia Psychology Journal*. 2019;7:1–12.
60. Lee YS, Yang HS, Jeong CJ, Yoo YD, Jeong GY, Moon JS, et al. Changes in the Thickness of Median Nerves Due to Excessive Use of Smartphones. *Journal of Physical Therapy Science*. 2012;24:1259–1262. doi:10.1589/jpts.24.1259.
61. Lee S, Kim M, Mcdonough I, Mendoza J, Kim M. The Effects of Cell Phone Use and Emotion-Regulation Style on College Students' Learning. *Applied Cognitive Psychology*. 2017;31(3):360–366. doi:10.1002/acp.3323.
62. Lee S, Kim M, Mendoza JS, McDonough IM. Addicted to Cellphones: Exploring the Psychometric Properties Between the Nomophobia Questionnaire and Obsessiveness in College Students. *Heliyon*. 2018;4(11):e00895. doi:https://doi.org/10.1016/j.heliyon.2018.e00895.
63. Lin CY, Griffiths MD, Pakpour AH. Psychometric Evaluation of Persian Nomophobia Questionnaire: Differential Item Functioning and Measurement Invariance Across Gender. *Journal of Behavioral Addiction*. 1;7(100-108). doi:10.1556/2006.7.2018.11.
64. Louragli I, Ahami A, Khadmaoui A, Mammad K, Chaker Lamrani A. Evaluation of the Nomophobia's Prevalence and its Impact on School Performance Among Adolescents in Morocco. *Problems of Psychology in the 21st Century*. 2018;12:84–94. doi:10.33225/ppc/18.12.84.
65. Mallya NV, Sunil Kumar DR, Mashal S. A Study to Evaluate the Behavioral Dimensions of “Nomophobia” and Attitude Toward Smartphone Usage Among Medical Students in Bengaluru. *National Journal of Physiology, Pharmacy and Pharmacology*. 2018;8(11):1553–1557. doi:10.5455/njppp.2018.8.0827603092018.
66. Mane S. A Descriptive Study to Assess the Risk of Developing Nomophobia Among Students of Selected Nursing Colleges of Navi Mumbai. *Imperial Journal of Interdisciplinary Research*. 2017;3(8).
67. Matoza-Báez CM, Carballo-Ramírez MS. Nomophobia Levels on Medical Students from Paraguay, Year 2015. *Ciencia e Investigación Médica Estudiantil Latinoamericana*. 2016;21(1):28–30.
68. Mendoza JS, Pody BC, Lee S, Kim M, McDonough IM. The Effect of Cellphones on Attention and Learning: The Influences of Time, Distraction, and Nomophobia. *Computers in Human Behavior*. 2018;86:52–60. doi:10.1016/j.chb.2018.04.027.

69. Menezes PM, Pangam S. Prevalence, Awareness and Effects of Nomophobia Among Adolescents. *International Journal of Psychiatric Nursing*. 2017;3(2):16–18. doi:10.5958/2395-180X.2017.00015.9.
70. Peris M, Maganto C, Garaigordobil M. Escala de Riesgo de Adicción Adolescente a las Redes Sociales e Internet: Fiabilidad y Validez (ERA-RSI). *Revista de Psicología Clínica con Niños y Adolescentes*. 2018;5(2):30–36. doi:10.21134/rpcna.2018.05.2.4.
71. Muralidhar M, Sudarshan B, T V S, Gopi A, Fernandes S. Nomophobia and its Determinants Among the Students of a Medical College in Kerala. *International Journal of Medical Science and Public Health*. 2017;6:1046–1049. doi:10.5455/ijmsph.2017.0203115022017.
72. Musa R, Janiffa S, Rahman S. Who's at Risk for Smartphone Nomophobia and Pathology; The Young or Matured Urban Millennials? *Advanced Science Letters*. 2017;23:7486–7489. doi:10.1166/asl.2017.9504.
73. Nagpal SS, Ramanpreet K. Nomophobia: The Problem Lies at our Fingertips. *Indian Journal of Health & Wellbeing*. 2016;7(12):1135–1139.
74. Nawaz I, Sultana I, Muhammad JA, Shaheen A. Measuring the Enormity of Nomophobia Among Youth in Pakistan. *Journal of Technology in Behavioral Sciences*. 2017;2(3-4):149–155. doi:10.1007/s41347-017-0028-0.
75. Nezhil O. Metaphoric Perceptions of High School Students about Nomophobia. *International Journal of Research in Education and Science*. 2018;5(2):437–449.
76. Nidhin A, Mathias J, Williams S. A Study to Assess the Knowledge and Effect of Nomophobia Among Students of Selected Degree Colleges in Mysore. *Asian Journal of Nursing Education and Research*. 2014;4(4):421–428.
77. Nisreen MI, Assala FM, Al-Maha YA. Assessment the Nomophobia Among Medical Students in Tikrit University College of Medicine. *The Medical Journal of Tikrit University*. 2018;24(2):78–94. doi:10.25130/mjotu.24.02.08.
78. Olivencia-Carrión M, Ferri-García R, Rueda M, Jiménez-Torres M, López-Torrecillas F. Temperament and Characteristics Related to Nomophobia. *Psychiatry Research*. 2018;266:5–10. doi:10.1016/j.psychres.2018.04.056.
79. Ozdemir B, Çakır Ö, Hussain I. Prevalence of Nomophobia Among University Students: A Comparative Study of Pakistani and Turkish Undergraduate Students. *Eurasia Journal of Mathematics, Science and Technology Education*. 2018;14:1519–1532. doi:10.29333/ejmste/84839.
80. Pavithra M, Madhukumar S, Mahadeva TM. A Study on Nomophobia. Mobile Phone Dependence Among Students of a Medical

College in Bangalore. *National Journal of Community Medicine*. 2015;6(2):340–344.

81. Prasad M, Basavaraj P, Singla A, Gupta R, Saha S, Kumar J, et al. Nomophobia: A Cross-sectional Study to Assess Mobile Phone Usage Among Dental Students. *Journal of Clinical and Diagnostic Research*. 2017;11(2):ZC34–ZC39. doi:10.7860/JCDR/2017/20858.9341.
82. Priyanka T, Kishanth O. A Quasi Experimental Study to Assess the Effect of Structured Teaching Programme on Knowledge Regarding Nomophobia among Students of Selected Colleges in District Jalandhar, Punjab. *International Journal of Nursing Education*. 2016;8(2):119–121. doi:10.5958/0974-9357.2016.00060.X.
83. Rangka I, Prasetyaningtyas W, Ifdil I, Ardi Z, Suranata K, Winingsih E, et al. Measuring Psychometric Properties of the Indonesian Version of the NoMoPhobia Questionnaire (NMPQ): Insight from Rasch Measurement Tool. *Journal of Physics: Conference Series*. 2018;1114(1):12127. doi:10.1088/1742-6596/1114/1/012127.
84. Rosales-Huamani J, Castillo-Sequera J, Guzman-Lopez R, Aroni-Vilca E, Matos C. Determining Symptomatic Factors of Nomophobia in Peruvian Students from the National University of Engineering. *Applied Sciences*. 2019;9:1814. doi:10.3390/app9091814.
85. Sakiroglu M, Gülada G, Uğurcan S, Kara N, Gandur T. The Mediator Effect of Mindfulness Awareness on The Relationship Between Nomophobia and Academic University Adjustment Levels in College Students. *International Journal of Psycho-Educational Sciences*. 2017;6(3):69–79.
86. Salwa AK. The Prevalence and Psychological Symptoms of Nomophobia among University Students. *Journal of Research in Curriculum Instruction and Educational Technology*. 2017;3(3):155–182. doi:10.12816/0042091.
87. Sebin S, Jinesh N. A Study on Impact of Smart Phone Usage on Health of College Going Students. *International Journal of Engineering Technology Science and Research*. 2018;5(3):684–689.
88. Semerci A. Nomophobia as the Predictor of Secondary School Students' Smartphone Addiction. *Bartın Üniversitesi Eğitim Fakültesi Dergisi*. 2019;8(3):947–965. doi:10.14686/BUEFAD.592443.
89. Sethia S, Melwani V, Melwani S, Priya A, Gupta M, Amreen K. A Study to Assess the Degree of Nomophobia Among the Undergraduate Students of a Medical College in Bhopal. *International Journal of Community Medicine and Public Health*. 2018;5(6):2442–2445.
90. Sharma N, Sharma P, Sharma N, Wavare R. Rising Concern of Nomophobia Amongst Indian Medical Students. *International Journal of Research in Medical Sciences*. 2015;3(3):705–707. doi:10.5455/2320-6012.ijrms20150333.



91. Silva Giraldo C, Almeida Salinas O, Corzo J, Rovira K, Suescun E. Identificación de la Relación Existente entre los Factores Predisponentes y Mantenedores en la Presencia de Nomofobia en los Estudiantes de Psicología Vinculados a la Corporación Universitaria Minuto de Dios-Bucaramanga. *Boletín Redipe*. 2018;7(10):216–234.
92. Tams S, Legoux R, Léger PM. Smartphone Withdrawal Creates Stress: A Moderated Mediation Model of Nomophobia, Social Threat, and Phone Withdrawal Context. *Computers in Human Behavior*. 2018;81:1–9. doi:10.1016/j.chb.2017.11.026.
93. Tavoracci MP, Meyrignac G, Richard L, Déchelotte P, Ladner J. Problematic Use of Mobile Phone and Nomophobia Among French College Students: Marie-Pierre Tavoracci. *European Journal of Public Health*. 2015;25(3):206. doi:10.1093/eurpub/ckv172.088.
94. Torres-Salazar Q, Ramírez-Gurrola A, Castañón-Alvarado M, Aroña-Campos A, Betancourt-Araujo A, Carrillo-Cisneros M, et al. Asociación entre Nomofobia e Indicadores de Inteligencia en Estudiantes de Educación Superior. *Revista Internacional de Investigación en Adicciones*. 2018;4:19–24. doi:10.28931/riiad.2018.2.03.
95. Uysal Ş, Doç Y, Özen H, Canan M, Salih Z, Anadolu L, et al. Social Phobia in Higher Education: The Influence of Nomophobia on Social Phobia. *The Global eLearning Journal*. 2016;5(2):2–8.
96. Veerapu N, Philip R, Vasireddy H, Gurralla S, Kanna S. A Study on Nomophobia and its Correlation with Sleeping Difficulty and Anxiety Among Medical Students in a Medical College, Telangana. *International Journal Of Community Medicine And Public Health*. 2019;6(5):2074. doi:10.18203/2394-6040.ijcmph20191821.
97. Yasan Ak N, Yildirim S. Nomophobia Among Undergraduate Students: The Case of a Turkish State University. *International Journal on New Trends in Education and Their Implications*. 2018;9(4):11–20.
98. Yavuz M, Altan B, Bayrak B, Gündüz M, Bolat N. The Relationships Between Nomophobia, Alexithymia and Metacognitive Problems in an Adolescent Population. *The Turkish Journal of Pediatrics*. 2019;61. doi:10.24953/turkjped.2019.03.005.
99. Yildiz-Durak H. What Would You Do Without Your Smartphone? Adolescents' Social Media Usage, Locus of Control, and Loneliness as a Predictor of Nomophobia. *Addicta: The Turkish Journal on Addictions*. 2018;5(3):543–557. doi:10.15805/addicta.2018.5.2.0025.
100. Yildiz-Durak H. Investigation of Nomophobia and Smartphone Addiction Predictors Among Adolescents in Turkey: Demographic Variables and Academic Performance. *The Social Science Journal*. 2019;56(4):492–517. doi:10.1016/j.soscij.2018.09.003.
101. King ALS, Valença AM, da Silva AC, Baczynski TP, de Carvalho MR, et al. Nomophobia: Dependency on virtual environments or social phobia? *Computers in Human Behavior*. 2013;29(1):140–144. doi:10.1016/j.chb.2012.07.025.

102. Bragazzi N, Del Puente G. A Proposal for Including Nomophobia in the New DSM-V. *Psychology Research and Behavior Management*. 2014;7:155–60. doi:10.2147/PRBM.S41386.
103. Cheever NA, Rosen LD, Carrier LM, Chavez A. Out of Sight is Not Out of Mind: The Impact of Restricting Wireless Mobile Device Use on Anxiety Levels among Low, Moderate and High Users. *Computers in Human Behavior*. 2014;37:290–297. doi:10.1016/j.chb.2014.05.002.
104. Tran D. Classifying Nomophobia as Smart-Phone Addiction Disorder. *UC Merced Undergraduate Research Journal*. 2016;9(1).
105. Rosen L, Carrier LM, Miller A, Rokkum J, Ruiz A. Sleeping with Technology: Cognitive, Affective, and Technology Usage Predictors of Sleep Problems Among College Students. *Sleep Health in Early Care and Education*. 2016;2(1):49–56. doi:10.1016/j.sleh.2015.11.003.
106. Pistilli N, Cain J. Using a Health Care Practice Framework to Address Smartphone Use in the Classroom. *Currents in Pharmacy Teaching and Learning*. 2016;8(2):247–253. doi:10.1016/j.cptl.2015.12.020.
107. Pathak NK. Digital Detox in India. *Journal of Research in Humanities & Soc Sciences*. 2016;4(8).
108. Belk R. Extended Self and the Digital World. *Current Opinion in Psychology*. 2016;10:50–54. doi:10.1016/j.copsy.2015.11.003.
109. Aagaard J. Mobile devices, Interaction, and Distraction: A Qualitative Exploration of Absent Presence. *AI & Society*. 2016;31:1–9. doi:10.1007/s00146-015-0638-z.
110. Kuss DJ, Griffiths MD. Social Networking Sites and Addiction: Ten Lessons Learned. *International Journal of Environmental Research and Public Health*. 2017;14(3). doi:10.3390/ijerph14030311.
111. García-Umaña A. Impacto social y educativo del comportamiento mediático digital contemporáneo: Nomofobia, causas y consecuencias [Social and educational impact of contemporary digital media behavior: Nomophobia, causes and consequences]. *Dilemas contemporáneos*. 2017;5:1–21.
112. Prasyatiani T, Hijriarahmah D, Solamat LA. Seven Magic Days to Prevent Nomophobia; 2017.
113. Papaconstantinou E, Bartfay WJ, Bartfay E. Smartphone Use, Sleep Quality and Quantity, and Mental Health Outcomes in a University Population. *Sleep Medicine*. 2017;40:e251. doi:10.1016/j.sleep.2017.11.735.
114. Akun A, Andreani W. Powerfully Technologized, Powerlessly Connected: The Psychosemiotics of Nomophobia. In: 10th International Conference on Human System Interactions; 2017. p. 306–310.

115. van Velthoven MH, Powell J, Powell G. Problematic Smartphone Use: Digital Approaches to an Emerging Public Health Problem. *Digital Health*. 2018;4:2055207618759167. doi:10.1177/2055207618759167.
116. G'uzel c. Fear of the age: Nomophobia (No Mobile Phone). *Journal of Academic Perspective on Social Studies*. 2018;12(20-24).
117. Wang G, Suh A. Disorder or Driver?: The Effects of Nomophobia on Work-Related Outcomes in Organizations; 2018. p. 1–12.
118. Bychkov D, Young S. In: Facing Up to Nomophobia: A Systematic Review of Mobile Phone Apps that Reduce Smartphone Usage; 2018. p. 161–171.
119. Bhattacharya S, Bashar M, Srivastava A, Singh A. NOMOPHOBIA: NO MOBILE PHONE PHOBIA. *Journal of Family Medicine and Primary Care*. 2019;8:1297. doi:10.4103/jfmpe.jfmpe.71.19.
120. Liu S, Xiao T, Yang L, Loprinzi PD. Exercise as an Alternative Approach for Treating Smartphone Addiction: A Systematic Review and Meta-Analysis of Random Controlled Trials. *International Journal of Environmental Research and Public Health*. 2019;16(20). doi:10.3390/ijerph16203912.
121. Gezgin D, Hamutoglu N, Sezen-Gultekin G, Yildirim S. Preservice Teachers' Metaphorical Perceptions on Smartphone, No Mobile Phone Phobia (Nomophobia) and Fear of Missing Out (FoMO). 2019;doi:10.14686/buefad.516540.
122. Anshari M, Alas Y, Sulaiman E. Smartphone addictions and nomophobia among youth. *Vulnerable Children and Youth Studies*. 2019;14:1–6. doi:10.1080/17450128.2019.1614709.
123. Betoncu O, Ozdamli F. The Disease of 21st Century: Digital Disease. *TEM Journal*. 2019;8(2):598–603.
124. Park CS, Kaye BK. Smartphone and Self-Extension: Functionally, Anthropomorphically, and Ontologically Extending Self via the Smartphone. *Mobile Media & Communication*. 2019;7(2):215–231. doi:10.1177/2050157918808327.
125. King ALS, Valena AM, Nardi AE. Nomophobia: the Mobile Phone in Panic Disorder with Agoraphobia: Reducing Phobias or Worsening of Dependence? *Cognitive and Behavioral Neurology*. 2010;23(1):52–4. doi:0.1097/WNN.0b013e3181b7eabc.
126. Yildirim C. Exploring the Dimensions of Nomophobia: Developing and Validating a Questionnaire Using Mixed Methods research. Iowa State University; 2014.
127. Yildirim C, Correia AP. Exploring the Dimensions of Nomophobia: Development and Validation of a Self-Reported Questionnaire. *Computers in Human Behavior*. 2015;49:130–137. doi:10.1016/j.chb.2015.02.059.

128. Yildirim C, Correia AP. Understanding Nomophobia: A Modern Age Phobia Among College Students. In: *Learning and Collaboration Technologies*. Springer; 2015. p. 724–735.
129. Yildirim C, Sumuer E, Adnan M, Yildirim S. A Growing Fear: Prevalence of Nomophobia Among Turkish College Students. *Information Development*. 2015;32(5):1322–1331. doi:10.1177/0266666915599025.
130. Ramos-Soler I, López-Sánchez C, Quiles-Soler MC. Adaptación y Validación de la Escala de Nomofobia de Yildirim y Correia en Estudiantes Españoles de la Educación Secundaria Obligatoria. *Salud y Drogas*. 2017;17(2):201. doi:10.21134/haaj.v17i2.332.
131. Wahyuningtyas TA, Wibowo ME, Mulawarman M. Metaphor Reality Group Counseling Techniques to Increase Self-Esteem Students with Nomophobia Symptoms. *Jurnal Bimbingan Konseling*. 2020;9(1 SE).
132. Gutiérrez-Puertas L, Hernández VV, São-Romão-Preto L, Granados-Gámez G, Gutiérrez-Puertas V, Aguilera-Manrique G. Comparative Study of Nomophobia Among Spanish and Portuguese University Students. *Nomophobia in Nursing Students. Nurse Education in Practice*. 2019;34. doi:10.1016/j.nepr.2018.11.010.
133. González-Cabrera J, León-Mejía A, Calvete E, Pérez-Sancho C. Adaptación al español del Cuestionario Nomophobia Questionnaire (NMP-Q) en una Muestra de Adolescentes. *Actas Españolas de Psiquiatría*. 2017;45(4):137–144.
134. León-Mejía A, Calvete E, Patino-Alonso C, Machimbarrena JM, González-Cabrera J. Nomophobia Questionnaire (NMP-Q): Factorial Structure and Cut-Off Points for the Spanish Version. *Adicciones*. 2020; p. 1316.
